# Supplementary material for: Multicenter retrospective study on effectiveness, reported side effects, and cognitive outcomes of SSRIs in 22q11.2 deletion syndrome
Source: Research Square preprint supplement (doi:10.21203/rs.3.rs-8286229/v1), 2025-12-11
Supplement: Supplementary file 1 [file 0ab942ac8012285a564da6fa.docx]

**Supplementary Material**

**Supplementary Tables**

**Supplementary Table 1.** Participant characteristics (SSRI-treated vs. SSRI-untreated) at first time-point

|  | **Group** | | **Comparison** | | | |
| --- | --- | --- | --- | --- | --- | --- |
|  | **SSRI-treated** | **SSRI-untreated** | **Pearson’s**  **Chi square** | **Mann Whitney test** | **t-test** | ***p* value** |
| N (% of full sample) | 101 (32.2%) | 213 (67.8%) |  |  |  |  |
| Sex, N male (%) | 45 (44.6%) | 92 (43.2%) | 0.227 |  |  | 0.820 |
| Age, y; M (SD) | 16.3 (6.06) | 15.6 (8.06) |  | 9975 |  | 0.264 |
| FSIQ, M (SD) | 73.0 (13.1) | 74.5 (12.9) |  |  | 0.988 | 0.324 |
| PIQ, M (SD) | 70.9 (11) | 70.2 (13.8) |  | 3880 |  | 0.571 |
| VIQ, M (SD) | 76.6 (14.7) | 76.1 (14.1) |  |  | 0.263 | 0.793 |

TP = time-point; FSIQ = Full-scale Intelligence Quotient; PIQ = Performance Intelligence Quotient; VIQ = Verbal Intelligence Quotient ; y = years

|  | | **Group** | |  |  | **Comparison** |
| --- | --- | --- | --- | --- | --- | --- |
|  | **SSRI+PS** | | **noSSRI+PS** | **SSRI+noPS** | **noSSRI+noPS** | ***p* value** |
| N (% of full sample) | 25 (%) | | 38 (%) | 44 (%) | 208 (%) |  |
| Sex, N male (%) | 15 (60%) | | 22 (57.9%) | 16 (36.4%) | 90 (43.3%) | 0.095a |
| Age, y; M (SD) | 13.2 (3.47) | | 13 (4.03) | 14.4 (3.91) | 15.5 (8.07) | 0.323b |
| FSIQ, M (SD) | 79.7 (13.2)† | | 77.3 (12.7)† | 69.5 (14.2) | 74.7 (13)† | **0.008c** |

**Supplementary Table 2.** Participant characteristics (SSRI+PS vs. noSSRI+PS vs. SSRI+noPS vs. noSSRI+noPS) at first time-point

Probability values refer to Pearson chi-square testa, Kruskal–Wallis testb, and one-way ANOVAc. Post-hoc pairwise comparisons for FSIQ were conducted using unpaired t-tests. Significant p-values (p<0.05) are shown in **bold**. † p < .05 indicates the three significant comparisons: SSRI+noPS vs. SSRI+PS, SSRI+noPS vs. noSSRI+PS, and SSRI+noPS vs. noSSRI+noPS.

**Supplementary Table 3.** Wechsler scale versions used across assessments

|  | **Number of assessments** | **Proportion** |
| --- | --- | --- |
| WPPSI-III | 23 | 3.49% |
| WPPSI-R | 16 | 2.43% |
| WPPSI-IV | 1 | 0.15% |
| WISC-R | 22 | 3.34% |
| WISC-III | 91 | 13.81% |
| WISC-IV | 38 | 5.77% |
| WISC-V | 21 | 3.19% |
| WAIS-III | 205 | 31.11% |
| WAIS-IV | 62 | 9.41% |
| WASI-I | 116 | 17.60% |
| WASI-II | 64 | 9.71% |
| Total | 659 | 100% |
|  |  |  |

WPPSI = Wechsler Preschool and Primary Scale of Intelligence; WISC = Wechsler Intelligence Scale for Children; WAIS = Wechsler Adult Intelligence Scale; WASI = Wechsler Abbreviated Scale of Intelligence.

**Supplementary Table 4.** Results of the mixed-model regression analyses of FSIQ, PIQ, and VIQ according to age and time-point in the SSRI-treated and SSRI-untreated groups

|  | | | Group effect | | | | Interaction with age or time-point | | | |
| --- | --- | --- | --- | --- | --- | --- | --- | --- | --- | --- |
| Dependent variable | Independent variable | Model order | *p*-value | Log likelihood (df) | Intercept SSRI-treated | Intercept   SSRI-untreated | *p*-value | Log likelihood (df) | Age slope   SSRI-treated | Age slope   SSRI-untreated |
| FSIQ | Age | linear | **0.002** | 12.48, 2 | 71.99 ± 2.62 | 81.32 ± 1.85 | **<0.001** | 12.18, 1 | 0.05 ± 0.13 | -0.43 ± 0.10 |
| PIQ | Age | linear | **<0.001** | 18.58, 2 | 66.45 ± 3.46 | 79.16 ± 2.51 | **<0.001** | 18.14, 1 | 0.20 ± 0.17 | -0.54 ± 0.13 |
| VIQ | Age | linear | **0.001** | 13.73, 2 | 74.85 ± 3.34 | 86.03 ± 2.67 | **<0.001** | 13.34, 1 | 0.01 ± 0.16 | -0.65 ± 0.14 |
| FSIQ | Time-point | linear | **<0.001** | 19.56,2 | 69.95 ± 1.51 | 75.35 ± 1.07 | **<0.001** | 19.12, 1 | 2.13 ± 0.60 | -0.80 ± 0.44 |
| PIQ | Time-point | linear | **0.004** | 11.15, 2 | 67.65 ± 1.98 | 70.13 ± 1.44 | **0.002** | 9.89, 1 | 2.35 ± 0.78 | -0.39 ± 0.65 |
| VIQ | Time-point | linear | **<0.001** | 28.34, 2 | 72.10 ± 1.97 | 78.65 ± 1.53 | **<0.001** | 28.19 1 | 2.24 ± 0.77 | -2.54 ± 0.67 |
| Significant p-values (p<0.05) are shown in **bold**. FSIQ = Full-scale Intelligence Quotient; PIQ = Performance Intelligence Quotient; VIQ = Verbal Intelligence Quotient. | | | | | | | | | | |

**Supplementary Table 5.** Mean age and age range (years) at each time point (TP) for SSRI-treated and SSRI-untreated groups.

|  | **TP1** | **TP2** | **TP3** | **TP4** |
| --- | --- | --- | --- | --- |
| SSRI-treated | 16.3 (6–34) | 19.4 (9–33) | 22.3 (12–33) | 25.1 (15–32) |
| SSRI-untreated | 15.6 (4–34) | 15.2 (5–33) | 16.2 (6–30) | 17.9 (12–28) |

**Supplementary Table 6.** Range of IQ change (ΔIQ = last − first time-point) for SSRI-treated and SSRI-untreated groups, across full-scale IQ (FSIQ), performance IQ (PIQ), and verbal IQ (VIQ).

|  | **Group** | **Range of ΔIQ (min to max)** |
| --- | --- | --- |
| FSIQ | SSRI-treated | -18 to +27 |
| SSRI-untreated | -26 to +19 |
| PIQ | SSRI-treated | -20 to +17 |
| SSRI-untreated | -26 to +23 |
| VIQ | SSRI-treated | -23 to +22 |
| SSRI-untreated | -39 to +17 |

**Supplementary Table 7.** Results of the mixed-model regression analyses of FSIQ according to age and time-point in three subgroups: (1) treated with both SSRIs and psychostimulants (SSRI+PS); (2) untreated with SSRIs but treated with psychostimulants (noSSRI+PS); and (3) treated with SSRIs but untreated with psychostimulants (SSRI+noPS), across age and time-points

|  | | | Group effect | | | | |  | |  | | | Interaction with age or time-point | | |
| --- | --- | --- | --- | --- | --- | --- | --- | --- | --- | --- | --- | --- | --- | --- | --- |
| Dependent variable | Independent variable | Model order | *p*-value | Log likelihood (df) | Intercept SSRI+PS | Intercept   noSSRI+PS | Intercept   SSRI+noPS | | *p*-value | | Log likelihood (df) | Age slope   SSRI+PS | | Age slope noSSRI+PS | Age slope   SSRI+noPS | |
| FSIQ | Age | linear | **<0.001** | 25.74, 4 | 70.10 ± 3.52 | 82.67 ± 4.29 | 68.38 ± 5.18 | | **0.004** | | 10.99, 2 | 0.88 ± 0.38 | | -0.37 ± 0.25 | -0.05 ± 0.31 | |
| FSIQ | Time-point | linear | **<0.001** | 24.39, 4 | 78.84 ± 3.05 | 75.02 ± 3.34 | 68.18 ± 2.61 | | **0.004** | | 10.98, 2 | 4.25 ± 1.67 | | -1.35 ± 1.49 | 0.80 ± 1.51 | |
| Significant p-values (p<0.05) are shown in **bold**. FSIQ = Full-scale Intelligence Quotient. | | | | | | | | | | | | | | | |

**Supplementary Table 8.** Results of the two-by-two mixed-model regression analyses of FSIQ according to age and time-point in participants with 22q11.2DS, stratified into three subgroups based on SSRI and/or psychostimulant (PS) treatment, across ages and time-points.

|  |  | | | Group effect | | | | Interaction with age or time-point | | | |
| --- | --- | --- | --- | --- | --- | --- | --- | --- | --- | --- | --- |
| Two-by-two  comparison | Dependent variable | Independent variable | Model order | *p*-value | Log likelihood (df) | Intercept *Group1* | Intercept   Group2 | *p*-value | Log likelihood (df) | Age slope   *Group1* | Age slope   Group2 |
| *SSRI+PS* vs. noSSRI+PS | FSIQ | Age | linear | **0.004** | 11.17, 2 | 67.69 ± 5.17 | 80.15 ± 4.36 | **0.003** | 8.68, 1 | 0.92 ± 0.30 | -0.22 ± 0.26 |
| *SSRI+PS* vs. noSSRI+PS | FSIQ | Time-point | linear | **0.004** | 10.84, 2 | 76.84 ± 3.48 | 78.88 ± 3.15 | **0.004** | 8.43, 1 | 3.14 ± 1.51 | -1.44 ± 1.60 |
| *SSRI+PS* vs. SSRI+noPS | FSIQ | Age | linear | **<0.001** | 17.80, 2 | 68.65 ± 5.26 | 69.78 ± 3.57 | **0.0140** | 6.04, 1 | 0.88 ± 0.31 | -0.03 ± 0.19 |
| *SSRI+PS* vs. SSRI+noPS | FSIQ | Time-point | linear | **<0.001** | 15.24,2 | 75.52 ± 3.59 | 68.27 ± 2.85 | **0.030** | 4.73, 1 | 4.08 ± 1.56 | 0.69 ± 1.43 |
| *noSSRI+PS* vs. SSRI+noPS | FSIQ | Age | linear | **0.045** | 6.21, 2 | 81.75 ± 4.50 | 69.96 ± 3.50 | **0.350** | 0.87, 1 | -0.33 ± 0.27 | -0.03 ± 0.18 |
| *noSSRI+PS* vs. SSRI+noPS | FSIQ | Time-point | linear | **0.024** | 7.47, 2 | 78.03 ± 3.13 | 67.92 ± 2.70 | **0.156** | 2.01, 1 | -1.12 ± 1.53 | 1.08 ± 1.29 |
| Significant p-values (p<0.05) are shown in **bold**. FSIQ = Full-scale Intelligence Quotient. | | | | | | | | | | | |

**Supplementary Table 9.** Results of correlations analyses between change in IQ scores and individual characteristics.

|  | Spearman’s correlations | | Pearson’s correlations | |  |
| --- | --- | --- | --- | --- | --- |
|  | *r* | *p*-value | *r* | *p*-value | adjusted *p* |
| **Δ Full-scale IQ** |  |  |  |  |  |
| Treatment duration | 0.294 | 0.009 |  |  | **0.036** |
| Age at treatment onset | -0.216 | 0.060 |  |  | 0.120 |
| Dosage | 0.111 | 0.412 |  |  | 0.412 |
| Baseline FSIQ |  |  | -0.142 | 0.218 | 0.291 |
| **Δ Performance IQ** |  |  |  |  |  |
| Treatment duration | 0.310 | 0.027 |  |  | 0.068 |
| Age at treatment onset |  |  | -0.125 | 0.381 | 0.508 |
| Dosage | 0.028 | 0.853 |  |  | 0.853 |
| Baseline PIQ |  |  | -0.297 | .034 | 0.068 |
| **Δ Verbal IQ** |  |  |  |  |  |
| Treatment duration | 0.204 | 0.106 |  |  | 0.212 |
| Age at treatment onset | -0.281 | 0.024 |  |  | 0.096 |
| Dosage | -0.182 | 0.232 |  |  | 0.310 |
| Baseline VIQ |  |  | -0.115 | 0.367 | 0.367 |

Significant FDR corrected p-values (p<0.05) are shown in **bold**. Δ represents the difference between the last and to the first IQ scores.

**Supplementary Figures**
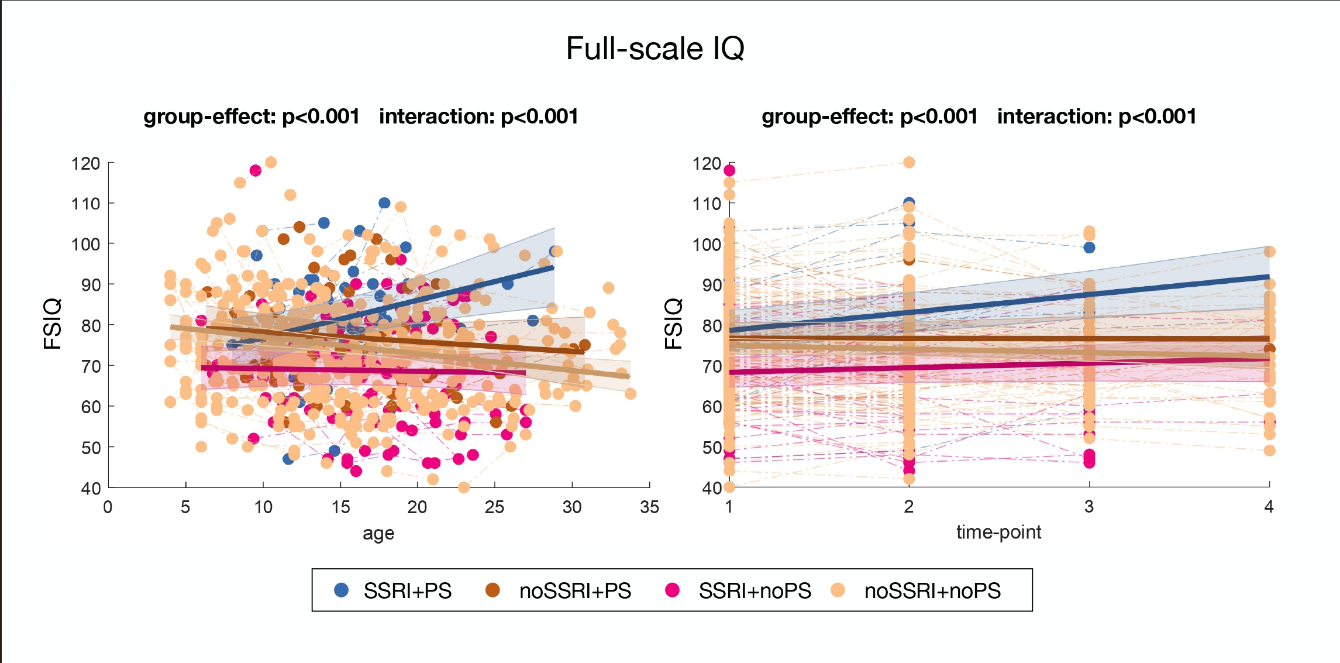


**Supplementary Figure 1.**Developmental trajectories of full-scale IQ (FSIQ) into four subgroups of participants: (1) treated with both SSRIs and PS (SSRI+PS); (2) untreated with SSRIs but treated with PS (noSSRI+PS); and (3) treated with SSRIs but untreated with PS (SSRI+noPS); and (4) untreated with SSRIs and PS (noSSRI+noPS), across age and time-points.


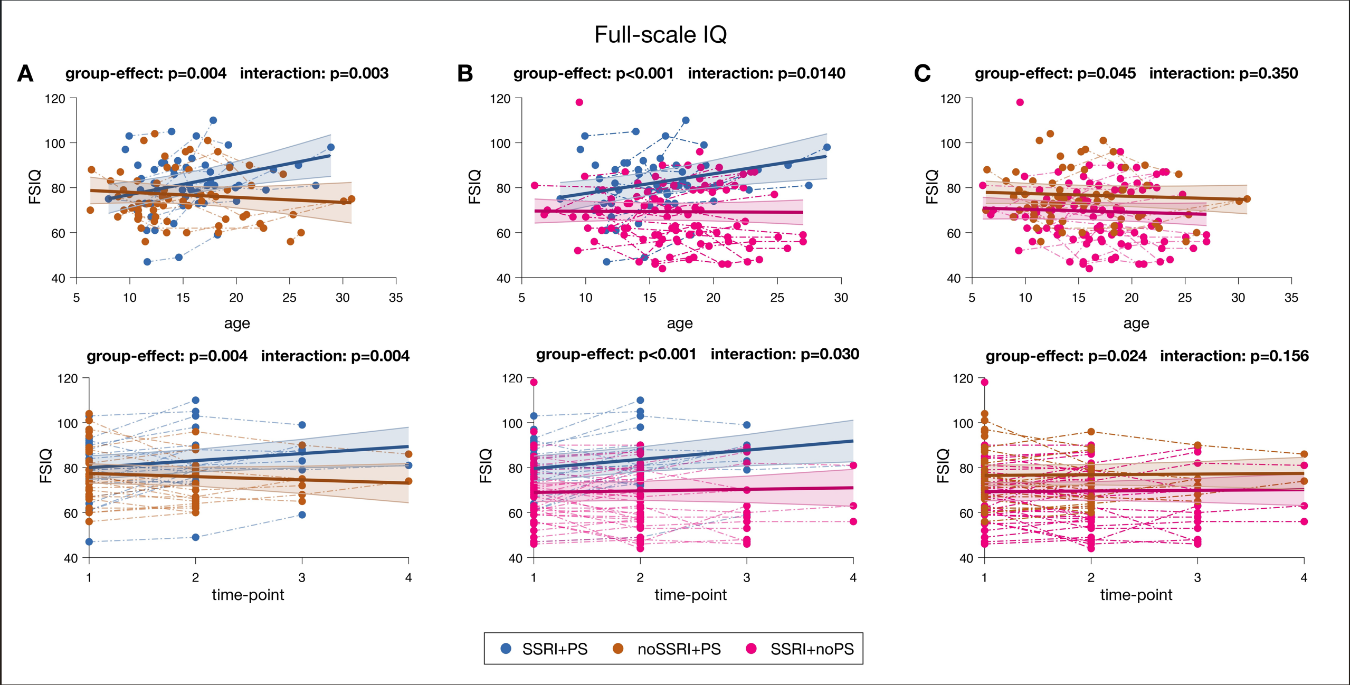


**Supplementary Figure 2.** Two-by-two comparisons of full-scale IQ (FSIQ) in participants with 22q11.2DS, stratified into three subgroups based on SSRI and/or psychostimulant (PS) treatment, across ages and time points. **A.** SSRI+PS vs. noSSRI+PS; **B.** SSRI+PS vs. SSRI+noPS; **C.** noSSRI+PS vs. SSRI+noPS.
